# Supplementary material for: High Bandwidth Synaptic Communication and Frequency Tracking in Human Neocortex
Source: PLoS Biol. 2014 Nov 25;12(11):e1002007. doi: 10.1371/journal.pbio.1002007 (PMC4244038; doi:10.1371/journal.pbio.1002007)
Supplement: Data S2 — Numerical data used to generate Figure 2A–C . Also shown in file ‘30Hz_EPSPs.rar’ in Dryad repository http://doi.org/10.5061/dryad.3723p [56]. (XLSX) [file pbio.1002007.s011.xlsx]

## Sheet: Figure 2A
Human tumor	Human epilepsy	Human colapsed	Adult mouse	Young mouse
0.45108		0.45108	0.31106	0.4351
0.35793		0.35793	0.19854	0.2053
0.42673		0.42673	0.4529	0.2121
0.2937		0.2937	0.33197	0.3568
0.46639		0.46639	0.31056	0.4265
0.53679		0.53679	0.42299	0.1248
--	0.40442	0.40442	0.22727	0.2377
0.47987	--	0.47987	0.2885	0.2186
0.41345	--	0.41345	0.16161	0.1001
0.28275	--	0.28275	0.22082	0.2313
0.3023	--	0.3023	0.28799	0.1802
0.19165	--	0.19165		0.2903
0.18862	--	0.18862		0.2814
0.3827	--	0.3827		0.318
--	0.30698	0.30698		0.2488
--	0.4816	0.4816		0.7598
--	0.53962	0.53962		0.3772
0.4284	--	0.4284		0.1737
--	0.71466	0.71466		0.2409
--	0.5237	0.5237		0.1929
--	0.55385	0.55385		0.2598
--	0.71476	0.71476		0.3644
--	0.43084	0.43084		0.2521
--	0.47429	0.47429		0.3372
--	0.4193	0.4193		0.4482
--	1.0423	1.0423		0.119
--	0.3773	0.3773		0.1934
				0.2639
				0.1938
				0.1892
				0.1941
				0.0982
				0.1227
				0.1581
				0.078

## Sheet: Figure 2B
Human tumor	Human epilepsy	Human colapsed	Adult mouse	Young mouse
73.5175		73.5175	693.411	752.929
79.9942		79.9942	1151.44	507.334
79.9103		79.9103	873.745	554.722
216.061		216.061	436.753	324.218
85.9712		85.9712	374.636	519.914
114.285		114.285	182.7	510.27
--	167.825	167.825	363.169	569.024
193.596	--	193.596	239.425	542.01
210.199	--	210.199	204.985	726.414
166.997	--	166.997	351.168	985.012
190.889	--	190.889	441.056	586.158
172.039	--	172.039		808.044
118.259	--	118.259		767.389
175.973	--	175.973		279.308
--	327.576	327.576		539.149
--	227.35	227.35		60.1452
--	56.0279	56.0279		424.006
224.455	--	224.455		614.392
--	125.958	125.958		605.156
--	140.756	140.756		1036
--	151.049	151.049		397.36
--	57.3575	57.3575		436.178
--	107.649	107.649		348.47
--	82.5817	82.5817		243.927
--	120.435	120.435		293.307
--	41.4559	41.4559		443.856
--	174.605	174.605		438.788
				595.962
				532.185
				601.618
				851.587
				1053
				269.878
				154.394
				386.305

## Sheet: Figure 2C
Human tumor	Human epilepsy	Human colapsed	Age
73.5175		73.5175	52
79.9942		79.9942	55
79.9103		79.9103	55
216.061		216.061	55
85.9712		85.9712	55
114.285		114.285	55
--	167.825	167.825	61
193.596	--	193.596	32
210.199	--	210.199	32
166.997	--	166.997	32
190.889	--	190.889	32
172.039	--	172.039	32
118.259	--	118.259	32
175.973	--	175.973	58
--	327.576	327.576	46
--	227.35	227.35	33
--	56.0279	56.0279	33
224.455	--	224.455	18
--	125.958	125.958	53
--	140.756	140.756	53
--	151.049	151.049	53
--	57.3575	57.3575	53
--	107.649	107.649	53
--	82.5817	82.5817	53
--	120.435	120.435	44
--	41.4559	41.4559	44
--	174.605	174.605	40
