# Supplementary material for: High Bandwidth Synaptic Communication and Frequency Tracking in Human Neocortex
Source: PLoS Biol. 2014 Nov 25;12(11):e1002007. doi: 10.1371/journal.pbio.1002007 (PMC4244038; doi:10.1371/journal.pbio.1002007)
Supplement: Table S2 — Kinetic parameters from EPSPs. (DOCX) [file pbio.1002007.s008.docx]

**Supplementary Table 2.EPSP kinetics**

|  | Human (n=27) | Young mouse (n=35) | Adult mouse (n=11) | p (Human vs Young mouse) | p (Human vs Adult mouse) | p (Young vs Adult mouse) |
| --- | --- | --- | --- | --- | --- | --- |
| 9th / 1st EPSP | 0,94  0,03 | 0,67  0,03 | 0,72  0,06 | p<0.001 | p<0.01 | n.s. |
| 8th / 1st EPSP | 0,38  0,03 | 0,44  0,05 | 0,30  0,04 | n.s. | n.s. | n.s. |
| Max Amplitude (mV) | 1,3  0,2 | 1,5  0,2 | 1,9  0,4 | n.s. | n.s. | n.s. |
| Rise time (ms) | 1,7  0,3 | 1,4  0,1 | 1,9  0,1 | n.s. | n.s. | n.s. |
| Decay time (ms) | 322 | 342 | 597 | n.s. | p<0.001 | p<0.001 |
| Decay time const. (ms) | 417 | 9022 | 6216 | n.s. | n.s. | n.s. |
