# Supplementary material for: High Bandwidth Synaptic Communication and Frequency Tracking in Human Neocortex
Source: PLoS Biol. 2014 Nov 25;12(11):e1002007. doi: 10.1371/journal.pbio.1002007 (PMC4244038; doi:10.1371/journal.pbio.1002007)
Supplement: Table S3 — Intrinsic cell properties, calculated from resting membrane potential and steady-state response to hyperpolarizing current injection pulse. (DOCX) [file pbio.1002007.s009.docx]

**Supplementary Table 3. Intrinsic cell properties**

|  | Human (n=27) | Young mouse (n=45) | Adult mouse (n=26) | p (Human vs Young mouse) | p (Human vs Adult mouse) | p (Young vs Adult mouse) |
| --- | --- | --- | --- | --- | --- | --- |
| Input resistance (m) | 706 | 843 | 1027 | n.s. | p<0.001 | n.s. |
| Rest Vm | -73.2  0.8 | -69.6  0.7 | -74.5  1.1 | p<0.05 | n.s. | p<0.001 |
